# Supplementary material
Source: Royal Society of Chemistry journal article supplement (doi:10.1039/d5fb00825e)
Supplement: d5fb00825e1.pdf [file d5fb00825e1.pdf]

1

## Supplementary File

### 2 **Antimicrobial silver nanoparticles doped poly(vinyl alcohol)/guar gum/gum** 3 **ghatti nanocomposites: A multifaceted step towards sustainable packaging**

4 Veena G. Bhat <sup>a</sup>, Saraswati P. Masti <sup>a,#</sup>, Shivayogi S. Narasagoudr <sup>b</sup>, Lingaraj Kariyappa Kurabetta <sup>a</sup>,  
5 Manjushree Nagaraj Gunaki <sup>a</sup>, Ajitkumar Appayya Hunashyal <sup>a</sup>, Ravindra B. Chougale <sup>c</sup>, Ravindra B.  
6 Malabadi<sup>d,e</sup>

7 <sup>a</sup>Department of Chemistry, Karnatak Science College, Dharwad-580 001, Karnataka, India.

8 <sup>b</sup>Reliance Industries Limited, Mumbai- 400 021, Maharashtra, India.

9 <sup>c</sup>P.G. Department of Studies in Chemistry, Karnatak University, Dharwad-580 003, Karnataka, India.

10 <sup>d</sup>Miller Blvd, NW, Edmonton, AB, Canada.

11 <sup>e</sup>Department of Applied Botany, Mangalore University, Mangalagangothri-574 199, Mangalore, Karnataka,  
12 India.

13 <sup>#</sup>Corresponding author: Saraswati P. Masti

14 <sup>#</sup>Corresponding author e-mail: [dr.saraswatimasti@yahoo.com](mailto:dr.saraswatimasti@yahoo.com)

### 15 **This File Contains**

16 S.1 Packaging Studies of Coriander Leaves

17 S.1.1 Percentage Weight Loss

18 S.1.2 Determination of Total Soluble Solids and pH

19 S.1.3 Determination of Total Chlorophyll Content

20 S.1.4 Sensory Evaluation

21 S.2 Results and Discussion

22 S.2.1 Visual Shelf-Life Analysis

23 S.2.2 Percentage Weight Loss

24 S.2.3 Total Soluble Solids (TSS) and pH Changes

25 S.2.4 Total Chlorophyll Content and Sensory Evaluation

## 26 **S.1 Packaging Studies of Coriander Leaves**

27 Fresh coriander leaves (*Coriandrum sativum*, locally cultivated in Dharwad, Karnataka, India)  
28 were procured directly from nearby farmers and transported to the laboratory within 2 h of  
29 harvest. The leaves were carefully inspected and sorted manually to maintain uniformity in  
30 colour, size, and structural integrity. Leaves showing signs of insect infestation, microbial  
31 spoilage, discolouration, or mechanical damage were discarded to minimize variability in the  
32 experimental samples. The selected leaves were grouped into bunches of approximately 50 g  
33 and used for packaging studies. Storage experiments were conducted under ambient laboratory  
34 conditions of 22-24 °C and relative humidity of approximately 85% for a period of 5 days.

35 Based on preliminary mechanical evaluation, PGGA-0 and PGGA-1 films were selected for  
36 the packaging study owing to their suitable tensile properties. Equal quantities of coriander  
37 leaves were packed in the respective films and monitored throughout the storage period for  
38 physicochemical and sensory changes.

### 39 **S.1.1 Percentage Weight Loss**

40 Weight loss of coriander leaves during storage was used as an indicator of moisture loss and  
41 quality deterioration. For each treatment (PGGA-0 and PGGA-1), three replicates were  
42 analyzed[1]. The initial weight of the packaged leaves was recorded using a calibrated  
43 analytical balance. At predetermined intervals during storage, the samples were removed and  
44 weighed again. The percentage weight loss was calculated on a fresh weight basis using the  
45 following relationship:

$$46 \text{ Weight Loss (\%)} = \frac{\text{Initial weight} - \text{Final weight}}{\text{Initial weight}} \times 100$$

47 where the weights are expressed in grams.

### 48 **S.1.2 Determination of Total Soluble Solids and pH**

49 The total soluble solids (TSS) content of coriander leaves was determined from the extracted  
50 filtrate. Approximately 2 g of fresh leaves were homogenized and filtered through cheesecloth  
51 to obtain a clear extract. The filtrate was analyzed using a digital refractometer (Cole-Palmer),  
52 and the results were recorded in °Brix [1].

53 For pH measurement, 1 g of coriander leaf tissue was homogenized with 10 mL of distilled  
54 water. The pH of the resulting solution was measured using a temperature-compensated bench

55 pH meter (Digital pH Meter, India). Each treatment was analyzed in triplicate to ensure  
56 reproducibility.

### 57 **S.1.3 Determination of Total Chlorophyll Content**

58 Chlorophyll content was analyzed as an indicator of the retention of green colour and freshness  
59 of the coriander leaves during storage[1]. A sample of 0.5 g of leaf tissue was ground using a  
60 mortar and pestle with 3 mL of acetone, followed by the addition of 5 mL of 80% acetone. The  
61 mixture was centrifuged at 4000 rpm for 10 min to separate the extract. The final volume of  
62 the supernatant was adjusted to 10 mL with 80% acetone. The absorbance of the extract was  
63 measured at 663 nm and 645 nm using a UV-Vis spectrophotometer (JASCO V-670, Japan).  
64 The total chlorophyll content was calculated using the following expression:

$$65 \text{ Total chlorophyll (mg/g)} = \frac{(20.29 A_{663} + 8.05 A_{645}) \times V}{1000 \times W}$$

66 where  $A_{663}$  and  $A_{645}$  represent absorbance values at the respective wavelengths, (V) is the total  
67 volume of extract (mL), and (W) is the weight of the sample (g).

### 68 **S.1.4 Sensory Evaluation**

69 The sensory quality of packaged coriander leaves was assessed throughout the storage period  
70 by a panel of evaluators (3 members). The parameters considered included visual appearance,  
71 colour retention, texture, and overall acceptability. The samples packaged with PGGA-0 and  
72 PGGA-1 films were compared at different storage intervals to determine the effectiveness of  
73 the films in maintaining the freshness and marketable quality of coriander leaves. Each attribute  
74 was scored using a standard hedonic scale, and the average values were reported

75

## 76 S.2 Results and Discussion

### 77 S.2.1 Visual Shelf-Life Analysis

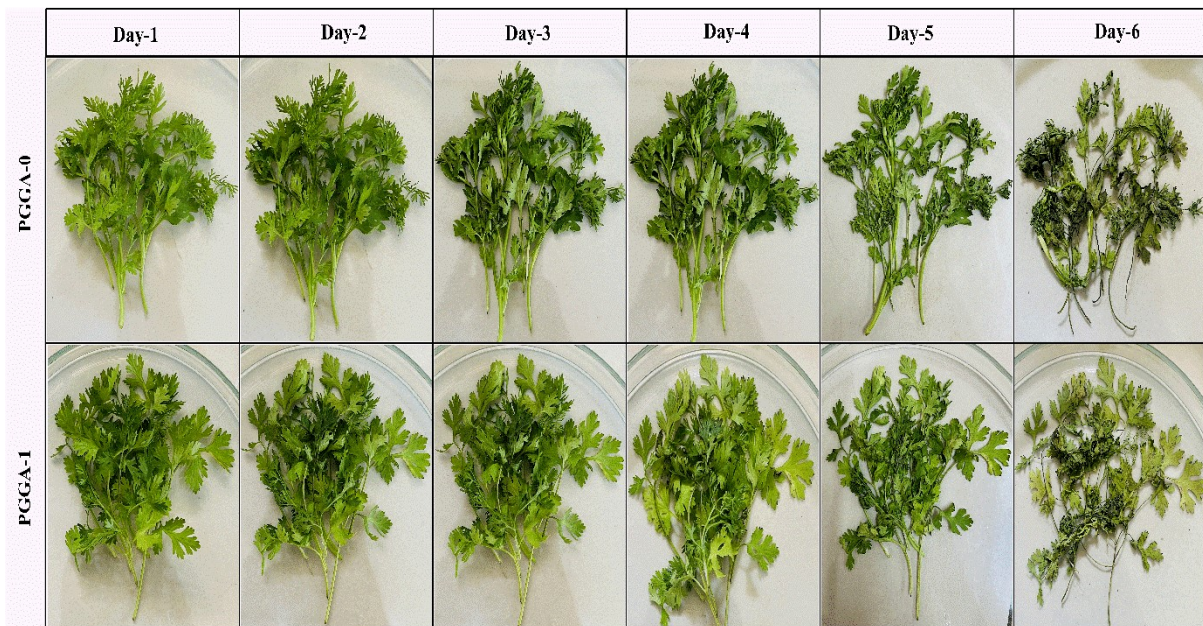

78 **Fig.S1 Visual representation of PGGA-0 and PGGA-1 packaged coriander leaves**

79 The visual progression of coriander leaves packaged using PGGA-0 (control) and PGGA-1  
80 films over 6 days is shown in Figure S1. Fresh samples (Day 1) exhibited bright green  
81 colouration and structural integrity in both treatments. However, progressive deterioration was  
82 evident during storage. In PGGA-0 (control), noticeable wilting, loss of turgidity, and  
83 discolouration began from Day 3 and became severe by Day 5-6, indicating rapid moisture loss  
84 and senescence. In contrast, PGGA-1 packaged samples retained comparatively better  
85 freshness, with delayed wilting and higher green colour retention up to Day 4-5. Even on Day  
86 6, although degradation was visible, structural integrity and colour retention were superior  
87 compared to PGGA-0. This behaviour aligns with previously reported active packaging  
88 systems, where incorporation of bioactive or barrier-enhancing components delays  
89 physiological degradation and moisture loss.

### 90 S.2.2 Percentage Weight Loss

91 Weight loss is a critical indicator of transpiration and metabolic activity. The percentage weight  
92 loss of coriander leaves increased progressively during storage for both films, indicating  
93 continuous moisture loss and physiological degradation. However, a significantly lower ( $p <$   
94  $0.05$ ) weight loss was observed in samples packaged with PGGA-1 compared to PGGA-0. By  
95 Day 6, PGGA-0 exhibited a maximum weight loss of  $25.36 \pm 0.78\%$ , whereas PGGA-1 limited  
96 the loss to  $17.15 \pm 0.69\%$ , demonstrating improved moisture retention. This reduction in weight

97 loss for PGGA-1 can be attributed to the incorporation of silver nanoparticles, which likely  
 98 enhanced the barrier properties of the polymeric matrix by reducing free volume and water  
 99 vapour permeability. Additionally, the antimicrobial activity of silver nanoparticles may have  
 100 contributed to reduced metabolic activity and transpiration rates, thereby slowing down  
 101 senescence. In contrast, the PGGA-0 film, lacking active nanofillers, exhibited higher moisture  
 102 diffusion and faster dehydration.

103 Table S1. Physicochemical (weight loss, TSS, pH, chlorophyll) and sensory changes of  
 104 samples packaged with PGGA-0 and PGGA-1 films during 6 days of storage

| Parameter                      | Film   | Day 1        | Day 2        | Day 3        | Day 4        | Day 5        | Day 6        |
|--------------------------------|--------|--------------|--------------|--------------|--------------|--------------|--------------|
| <b>Weight Loss (%)</b>         | PGGA-0 | 0.00 ± 00    | 3.11 ± 0.22  | 7.74 ± 0.45  | 12.55 ± 0.42 | 18.82 ± 0.54 | 25.26 ± 0.88 |
|                                | PGGA-1 | 0.00 ± 00    | 2.15 ± 0.08  | 5.36 ± 0.17  | 8.24 ± 0.61  | 12.58 ± 0.65 | 17.25 ± 0.89 |
| <b>TSS (°Brix)</b>             | PGGA-0 | 10.22 ± 0.24 | 10.38 ± 0.28 | 10.86 ± 0.11 | 11.44 ± 0.36 | 12.31 ± 0.40 | 12.85 ± 0.24 |
|                                | PGGA-1 | 10.22 ± 0.34 | 10.31 ± 0.17 | 10.55 ± 0.15 | 10.93 ± 0.21 | 11.37 ± 0.24 | 11.8 ± 0.27  |
| <b>pH</b>                      | PGGA-0 | 5.56 ± 0.05  | 5.62 ± 0.08  | 5.71 ± 0.06  | 5.82 ± 0.06  | 5.97 ± 0.07  | 6.17 ± 0.07  |
|                                | PGGA-1 | 5.56 ± 0.02  | 5.67 ± 0.04  | 5.75 ± 0.05  | 5.95 ± 0.05  | 6.04 ± 0.04  | 6.27 ± 0.08  |
| <b>Chlorophyll I (mg/g)</b>    | PGGA-0 | 2.85 ± 0.11  | 2.61 ± 0.11  | 2.20 ± 0.08  | 1.83 ± 0.07  | 1.43 ± 0.06  | 0.99 ± 0.04  |
|                                | PGGA-1 | 2.85 ± 0.13  | 2.72 ± 0.21  | 2.45 ± 0.12  | 2.22 ± 0.08  | 1.95 ± 0.02  | 1.64 ± 0.05  |
| <b>Sensory Score (9-point)</b> | PGGA-0 | 9.0 ± 0.0    | 7.7 ± 0.3    | 6.7 ± 0.4    | 5.3 ± 0.5    | 3.8 ± 0.4    | 2.9 ± 0.3    |
|                                | PGGA-1 | 9.0 ± 0.0    | 8.5 ± 0.2    | 7.7 ± 0.3    | 6.5 ± 0.4    | 5.6 ± 0.5    | 4.2 ± 0.4    |

105

### 106 S.2.3 Total Soluble Solids (TSS) and pH Changes

107 The total soluble solids (TSS) of coriander leaves showed a gradual increase during the storage  
 108 period for both packaging systems, reflecting moisture loss and concentration of soluble  
 109 constituents. The higher TSS in PGGA-0 can be attributed to accelerated moisture loss, leading  
 110 to the concentration of sugars and other soluble metabolites. Conversely, the reduced TSS  
 111 variation in PGGA-1 suggests improved moisture retention and a more stable internal  
 112 environment within the package. The incorporation of silver nanoparticles likely contributed  
 113 to enhanced barrier properties and reduced respiration-driven biochemical changes, thereby  
 114 slowing the accumulation of soluble solids.

115 The increase in pH can be associated with the degradation of organic acids and the  
116 accumulation of basic metabolites during respiration and microbial activity. The relatively  
117 moderated pH shift in PGGA-1 suggests a slower rate of biochemical deterioration, which may  
118 be attributed to the antimicrobial action of silver nanoparticles and improved barrier properties  
119 of the film. These factors likely reduce microbial proliferation and metabolic turnover, thereby  
120 stabilizing the internal biochemical environment. In contrast, PGGA-0, lacking active  
121 nanofillers, permits faster degradation processes, resulting in more pronounced changes.

#### 122 **S.2.4 Total Chlorophyll Content and Sensory Evaluation**

123 The total chlorophyll content of coriander leaves decreased progressively during storage for  
124 both packaging systems, indicating degradation of green pigments associated with senescence  
125 and loss of freshness. By Day 6, chlorophyll content in PGGA-0 decreased to  $0.98 \pm 0.05$  mg/g,  
126 whereas PGGA-1 maintained a higher value of  $1.65 \pm 0.07$  mg/g, demonstrating improved  
127 preservation of green colour. The rapid decline in chlorophyll in PGGA-0 can be attributed to  
128 enhanced enzymatic degradation (chlorophyllase activity) and oxidative reactions under higher  
129 moisture loss and oxygen exposure. In contrast, the improved retention in PGGA-1 may be due  
130 to the combined effect of better barrier properties and the presence of silver nanoparticles,  
131 which can reduce oxidative stress and microbial activity.

132 Sensory evaluation revealed a continuous decline in overall acceptability of coriander leaves  
133 with increasing storage time for both films. However, PGGA-1 packaged samples consistently  
134 received higher sensory scores compared to PGGA-0 throughout the storage period. By Day 6,  
135 PGGA-0 samples exhibited a sharp decline in acceptability ( $2.5 \pm 0.3$ ), characterized by severe  
136 wilting, discolouration, and loss of freshness, whereas PGGA-1 retained a comparatively  
137 higher score ( $4.6 \pm 0.4$ ), indicating moderate acceptability. The better sensory performance of  
138 PGGA-1 can be correlated with its ability to preserve key quality attributes such as colour,  
139 texture, and freshness, as supported by chlorophyll retention and reduced weight loss. The  
140 incorporation of silver nanoparticles likely contributed to reduced microbial spoilage and  
141 delayed deterioration, thereby maintaining overall quality perception. In contrast, PGGA-0  
142 showed rapid quality degradation due to higher moisture loss and faster biochemical changes.  
143 These findings confirm that PGGA-1 is more effective in extending the sensory shelf life of  
144 coriander leaves under ambient storage conditions.

145 Reference

146 [1] S. Pawde, S. R. Chaudhari, and R. S. Matche, 'Active Packaging for Strawberry and  
147 Coriander: A Natural Extract Impregnated Paper', *ACS Food Science & Technology*,  
148 vol. 4, no. 5, pp. 1166–1178, May 2024, doi: 10.1021/acsfoodscitech.4c00001.

149
